# Supplementary material for: Interrelationships among soil nitrogen transformation rates, functional gene abundance and soil properties in a tropical forest with exogenous N inputs
Source: Copernicus journal article supplement (doi:10.5194/bg-2019-101), 2019-04-15
Supplement: Supplementary file 1 [file bg-2019-101-supplement.pdf]

# **Interrelationships among soil nitrogen transformation rates, functional gene abundance and soil properties in a tropical forest with exogenous N inputs**

Yanxia Nie<sup>1</sup>, Xiaoge Han<sup>1</sup>, Jie Chen<sup>2</sup>, Mengcen Wang<sup>3</sup>, Weijun Shen<sup>1</sup>

<sup>1</sup>Key Laboratory of Vegetation Restoration and Management of Degraded Ecosystems, South China Botanical Garden, Chinese Academy of Sciences, Guangzhou 510650, PR China

<sup>2</sup>Research Institute of Tropical Forestry, Chinese Academy of Forestry, Guangzhou 510520, PR China

<sup>3</sup>Ministry of Agriculture Key Laboratory of Molecular Biology of Crop Pathogens and Insects, Zhejiang University, Hangzhou 310058, PR China

*Correspondence to:* Weijun Shen (shenweij@scbg.ac.cn)

**Table S1** Primer information of selected soil functional genes.

| <b>Gene</b>     | <b>Primers</b> | <b>Primer sequence (5'--3')</b>        | <b>Location</b> | <b>Length</b> | <b>References</b>                                  |
|-----------------|----------------|----------------------------------------|-----------------|---------------|----------------------------------------------------|
| <i>AOB-amoA</i> | amoA 1F        | 5' GGGGTTTCTACTGGTGGT 3'               | 322-249         | 500bp         | (Rich et al., 2003;<br>Levy-Booth et al.,<br>2014) |
|                 | amoA 2R        | 5' CCCCTCKGSAAAGCCTTCTTC 3'            | 802-822         |               |                                                    |
| <i>AOA-amoA</i> | CrenamoA 23F   | 5' ATGGTCTGGCTWAGACG 3'                | 7-24            | 620bp         | (Levy-Booth et al.,<br>2014)                       |
|                 | CrenamoA 616R  | 5' GCCATCCATCTGTATGTCCA 3'             | 611-631         |               |                                                    |
| <i>nirK</i>     | nirK F560-589  | 5'- GGGCATGAACGGCGCGCTCATGGTGCTGCC -3' | 560-589         | 376bp         | (Levy-Booth et al.,<br>2014)                       |
|                 | nirK R906-935  | 5'-CGGGTTGGCGAACTTGCCGGTGGTCCAGAC -3'  | 906-935         |               |                                                    |
| <i>nosZ</i>     | nosZ-F         | 5'- CGCTGTTCITCGACAGYCAG -3'           | 1181-1201       | 700bp         | (Rich et al., 2003)                                |
|                 | nosZ-R         | 5'- ATGTGCAKIGCRTGGCAGAA -3'           | 1880-1900       |               |                                                    |

(Han et al., 2018)

**Table S2** Reaction programs of quantitative PCR for selected functional genes.

| <b>Gene</b>         | <b>Primers</b>                 | <b>Thermal cycling conditions</b>   | <b>References</b>                            |
|---------------------|--------------------------------|-------------------------------------|----------------------------------------------|
| AOB-<br><i>amoA</i> | amoA 1F<br>amoA 2R             | 95 °30"-40(95 °15"-53 °15"-72 °40") | (Rich et al., 2003; Levy-Booth et al., 2014) |
| AOA-<br><i>amoA</i> | CrenamoA23F<br>CrenamoA616R    | 95 °30"-40(95 °5"-53 °34"-72 °60")  | (Levy-Booth et al., 2014)                    |
| <i>nirK</i>         | nirK F560-589<br>nirK R906-935 | 95 °30"-40(95 °5"-65 °34"-72 °60")  | (Levy-Booth et al., 2014)                    |
| <i>nosZ</i>         | nosZ-F<br>nosZ-R               | 95 °30"-40(95 °5"-56 °34"-72 °40")  | (Rich et al., 2003)                          |

(Han et al., 2018)

**Table S3**

Responses of soil properties and microbial biomass to nitrogen addition. Shown is the mean value  $\pm$  standard error ( $n = 3$ ). Different letters represent significant difference (one-way ANOVA,  $P < 0.05$ , LSD post hoc analysis) among different levels of N addition. Note: All the results were collected from surface soil samples (0-10 cm) except for special instructions.

|                              | Dry season      |                 |                 |                 |                 |                 |                 |                 | Wet season      |                 |                 |                 |                 |                 |                 |                 |
|------------------------------|-----------------|-----------------|-----------------|-----------------|-----------------|-----------------|-----------------|-----------------|-----------------|-----------------|-----------------|-----------------|-----------------|-----------------|-----------------|-----------------|
|                              | Jan, 2015       |                 |                 |                 | Jan, 2016       |                 |                 |                 | Jul, 2015       |                 |                 |                 | Jul, 2016       |                 |                 |                 |
|                              | Control         | LN              | MN              | HN              |
| pH                           | 3.73a<br>(0.04) | 3.77a<br>(0.02) | 3.72a<br>(0.04) | 3.73a<br>(0.02) | 3.78a<br>(0.07) | 3.81a<br>(0.05) | 3.68a<br>(0.07) | 3.76a<br>(0.03) | 3.9a<br>(0.03)  | 3.9a<br>(0.01)  | 3.84b<br>(0.02) | 3.8b<br>(0.02)  | 3.78a<br>(0.05) | 3.76a<br>(0.06) | 3.71a<br>(0.09) | 3.68a<br>(0.03) |
| TN<br>(mg g <sup>-1</sup> )  | 2.9a<br>(0.41)  | 2.43a<br>(0.17) | 2.73a<br>(0.36) | 2.63a<br>(0.17) | 2.31a<br>(0.44) | 1.88a<br>(0.22) | 2.22a<br>(0.15) | 2.08a<br>(0.38) | 1.86a<br>(0.13) | 1.7a<br>(0.38)  | 1.99a<br>(0.52) | 1.89a<br>(0.32) | 2.38a<br>(0.28) | 2.41a<br>(0.18) | 2.32a<br>(0.03) | 2.38a<br>(0.25) |
| SOC<br>(mg g <sup>-1</sup> ) | 52.3a<br>(7.5)  | 43.8a<br>(2.4)  | 50.5a<br>(7.02) | 42.4a<br>(3.5)  | 38.0a<br>(3.7)  | 24.8a<br>(5.7)  | 25.2a<br>(3.5)  | 32.1a<br>(9.8)  | 25.5a<br>(3.3)  | 25.8a<br>(4.7)  | 25.7a<br>(1.7)  | 27.6a<br>(2.9)  | 42.3a<br>(1.4)  | 35.0a<br>(9.2)  | 31.0a<br>(9.0)  | 33.7a<br>(9.5)  |
| C/N                          | 18.0a<br>(0.5)  | 18.0a<br>(0.3)  | 18.5a<br>(0.2)  | 16.1a<br>(1.1)  | 16.7a<br>(2.3)  | 13.2a<br>(2.5)  | 11.3a<br>(0.9)  | 15.2a<br>(2.4)  | 13.6a<br>(0.8)  | 15.3a<br>(1.0)  | 13.3a<br>(2.4)  | 14.7a<br>(1.0)  | 17.9a<br>(2.5)  | 14.5a<br>(3.3)  | 13.4a<br>(3.9)  | 14.1a<br>(3.2)  |
| TP<br>(mg g <sup>-1</sup> )  | 0.26a<br>(0.01) | 0.24a<br>(0.03) | 0.24a<br>(0.00) | 0.24a<br>(0.02) | 0.28a<br>(0.21) | 0.15a<br>(0.03) | 0.15a<br>(0.03) | 0.14a<br>(0.02) | 0.23a<br>(0.02) | 0.24a<br>(0.04) | 0.24a<br>(0.01) | 0.23a<br>(0.04) | 0.24a<br>(0.05) | 0.3a<br>(0.16)  | 0.24a<br>(0.11) | 0.25a<br>(0.04) |

|                                                           |                   |                  |                   |                  |                  |                  |                  |                 |                  |                  |                  |                  |                  |                   |                   |                   |
|-----------------------------------------------------------|-------------------|------------------|-------------------|------------------|------------------|------------------|------------------|-----------------|------------------|------------------|------------------|------------------|------------------|-------------------|-------------------|-------------------|
| SWC (%)                                                   | 38.7a<br>(1.2)    | 34.4a<br>(1.6)   | 36.9a<br>(5.6)    | 35.5a<br>(1.5)   | 43.19a<br>(1.4)  | 39.19a<br>(3.8)  | 43.48a<br>(5.9)  | 39.06a<br>(1.1) | 35.9a<br>(1.9)   | 33.8a<br>(1.8)   | 34.7a<br>(3.4)   | 33.7a<br>(1.0)   | 47.6a<br>(1.0)   | 45.5a<br>(0.6)    | 45.8a<br>(6.0)    | 45.8a<br>(2.6)    |
| NH <sub>4</sub> <sup>+</sup> -N<br>(mg kg <sup>-1</sup> ) | 2.81b<br>(1.03)   | 3.83ab<br>(1.10) | 2.75b<br>(0.58)   | 5.44a<br>(0.95)  | 0.97b<br>(0.25)  | 3.21a<br>(1.15)  | 3.81a<br>(0.74)  | 4.64a<br>(1.18) | 4.43a<br>(2.23)  | 6.73a<br>(3.46)  | 5.98a<br>(1.24)  | 3.04a<br>(1.21)  | 0.97a<br>(0.66)  | 0.64a<br>(0.19)   | 0.37a<br>(0.06)   | 0.28a<br>(0.05)   |
| NO <sub>3</sub> <sup>-</sup> -N<br>(mg kg <sup>-1</sup> ) | 6.42a<br>(0.63)   | 5.15a<br>(2.02)  | 7.85a<br>(4.05)   | 9.8a<br>(2.23)   | 4.95c<br>(0.75)  | 5.57c<br>(0.63)  | 9.7a<br>(1.35)   | 7.81b<br>(1.00) | 7.08a<br>(1.67)  | 7.54a<br>(0.73)  | 6.96a<br>(1.91)  | 9.62a<br>(0.8)   | 11.45a<br>(2.62) | 13.63a<br>(1.89)  | 13.9a<br>(1.96)   | 13.06a<br>(0.57)  |
| MBC<br>(mg kg <sup>-1</sup> )                             | 508.8a<br>(161.9) | 447.5a<br>(88.4) | 466.6a<br>(162.8) | 382.1a<br>(39.3) | 435.3b<br>(60.6) | 421.2b<br>(24.3) | 525.5a<br>(33.1) | 419.2b<br>(5.4) | 504.5a<br>(25.1) | 521.2a<br>(57.4) | 464.8a<br>(56.0) | 498.2a<br>(33.6) | 671.0a<br>(52.8) | 540.0a<br>(187.7) | 690.3a<br>(326.7) | 800.7a<br>(216.1) |
| MBN<br>(mg kg <sup>-1</sup> )                             | 72.7a<br>(20.4)   | 70.4a<br>(15.7)  | 58.0a<br>(13.3)   | 60.6a<br>(11.1)  | 74.0a<br>(6.3)   | 67.3a<br>(18.2)  | 88.2a<br>(8.2)   | 64.9a<br>(1.3)  | 49.4a<br>(0.9)   | 51a<br>(6.1)     | 47.2a<br>(4.4)   | 49.7a<br>(3.5)   | 130.8a<br>(45.3) | 122.7a<br>(24.8)  | 123.2a<br>(21.2)  | 119.1a<br>(8.5)   |

(Nie et al., 2018)

## References

- Han, X. G., Shen, W. J., Zhang, J. B., and Muller, C.: Microbial adaptation to long-term N supply prevents large responses in N dynamics and N losses of a subtropical forest, *Sci. Total Environ.*, 626, 1175-1187, <https://doi.org/10.1016/j.scitotenv.2018.01.132>, 2018.
- Nie, Y. X., Wang, M. C., Zhang, W., Ni, Z., Hashidoko, Y., and Shen, W. J.: Ammonium nitrogen content is a dominant predictor of bacterial community composition in an acidic forest soil with exogenous nitrogen enrichment, *Sci. Total Environ.*, 624, 407-415, <https://doi.org/10.1016/j.scitotenv.2017.12.142>, 2018.
